# Supplementary material for: Can the sustainable development goals for cancer be met in Brazil? A population-based study
Source: Front Oncol. 2023 Jan 10;12:1060608. doi: 10.3389/fonc.2022.1060608 (PMC9872119; doi:10.3389/fonc.2022.1060608)
Supplement: Supplementary file 1 [file Table_1.xlsx]

## Sheet: both
Probability of death in the last predicted period (2026-2030) compared to and the last observed period (2011-2015) in relation to the 33% reduction target 3·4
Men	Brazil	North	Northeast	Southeast	South	Midwest
All cancer types combined	-0.124	0.0107264	-0.0337564	-0.144635	-0.146899	-0.0727274
Mouth and Pharynx	-0.160029	0.135931	-0.062684	-0.205085	-0.151612	-0.0289716
Oesophagus	-0.194251	0.100167	0.134353	-0.236423	-0.273432	-0.0861727
Stomach	-0.213462	-0.110713	-0.173147	-0.232398	-0.19314	-0.306549
Colorectum	0.101676	0.519802	0.352725	0.0445519	0.131549	0.192976
Liver	-0.0453015	-0.162221	-0.0787333	-0.0613337	0.0563646	-0.0562099
Gallblader	0.0114611	0.337197	0.22355	-0.11733	0.0587522	0.0809853				·
Pancreas	0.0232733	-0.0599998	0.175333	-0.0192448	0.072563	0.0385432
Larynx	-0.133617	0.0995171	0.13625	-0.186228	-0.262523	0.0301175
Lung - with Trachea	-0.280584	-0.204367	-0.166071	-0.296272	-0.321977	-0.171129
Skin Melanoma	-0.264153	NA	-0.152943	-0.245129	-0.181619	-0.375121
Prostate	-0.190931	-0.246156	-0.206864	-0.188857	-0.201589	-0.115446
Testis	0.396711	NA	NA	0.367299	0.653957	NA
Kidney	-0.000400198	0.281027	0.0748453	-0.0743052	0.0831046	0.418027
Bladder	-0.116056	-0.0704715	0.186833	-0.162628	-0.114849	-0.0206549
Brain and Central Nervous System	-0.0225734	1.02021	-0.0111323	-0.0156062	-0.192067	0.0265412
Thyroid	-0.153266	NA	-0.133731	0.0454303	-0.329602	NA
Hodgking Disease	0.0286308	NA	0.28096	0.00407442	-0.273697	NA
Non Hodgking Disease	-0.120029	0.340761	-0.016922	-0.184012	-0.135155	-0.0443551
Multiple Mieloma	-0.0684747	0.257529	0.211712	-0.168974	-0.0953906	-0.151639
Leukemia	-0.151964	-0.186137	-0.0790654	-0.175382	-0.124812	-0.193561
Others	0.020152	0.157084	-0.0411552	0.0635318	-0.0250568	0.011428
Women	Brazil	North	Northeast	Southeast	South	Midwest
All cancer types combined	-0.0462581	0.0320269	-0.0278864	-0.0554292	-0.0641754	-0.046103
Mouth and Pharynx	-0.145773	-0.165079	-0.157514	-0.136306	-0.148569	-0.00316198
Oesophagus	-0.247416	-0.114346	-0.0919788	-0.264553	-0.321786	-0.217452
Stomach	-0.0972532	-0.160565	-0.0991597	-0.119352	-0.0672504	0.0190612
Colorectum	0.0846356	0.0275535	0.376623	0.0734287	0.00288206	0.0236773
Liver	-0.0699875	-0.313468	-0.177942	-0.0141291	0.152386	-0.190222
Gallblader	-0.0983679	0.387359	-0.166987	-0.0911484	-0.264531	0.0112858
Pancreas	0.0547782	-0.306521	0.103666	0.107033	0.0032868	0.0514456
Larynx	-0.0961841	NA	0.259108	-0.235542	-0.130942	0.153805
Lung - with Trachea	0.0110077	-0.124988	0.0965395	-0.0419899	0.0627867	0.110815
Skin Melanoma	-0.175885	NA	-0.116445	-0.12837	-0.208725	0.187741
Female Breast	0.00108258	0.255889	0.0725177	-0.0397429	0.0099699	0.0404707
Cervix Uteri	-0.115415	-0.11879	-0.169477	-0.125841	-0.0497589	-0.234444
Corpus Uteri	0.141242	0.518747	0.0222222	0.296172	-0.289359	0.256393
Ovary	-0.0498409	0.162602	0.0109418	-0.108519	-0.104584	0.126007
Kidney	-0.0260272	NA	-0.221152	-0.0309856	-0.00679898	0.105524
Bladder	0.0271456	-0.155356	-0.0286154	0.0803465	0.0427254	-0.221481
Brain and Central Nervous System	-0.0699245	0.919438	-0.10712	-0.0686294	-0.163297	-0.147066
Thyroid	0.121905	NA	-0.0857974	0.271879	-0.431578	-0.358569
Hodgking Disease	0.145251	NA	0.191711	0.273555	0.385518	NA
Non Hodgking Disease	-0.155166	-0.141623	0.00251804	-0.215535	-0.168953	-0.274177
Multiple Mieloma	-0.0818403	NA	0.196509	-0.102436	-0.282356	-0.052374
Leukemia	-0.159799	-0.11456	-0.205101	-0.159583	-0.0274714	-0.231424
Others	0.0318287	0.0535485	-0.0439374	0.12625	-0.017808	-0.180824
NA: Not Available
* Probability of dying between the ages of 30 and 70 years from cancer
